# Supplementary material for: Lack of Casein Kinase 1 Delta Promotes Genomic Instability - The Accumulation of DNA Damage and Down-Regulation of Checkpoint Kinase 1
Source: PubMed Central journal article supplement (PMC5268481; doi:10.1371/journal.pone.0170903), 2017-01-26
Supplement: pone.0170903.s001.pdf [file pone.0170903.s001.pdf]

## S1 Fig

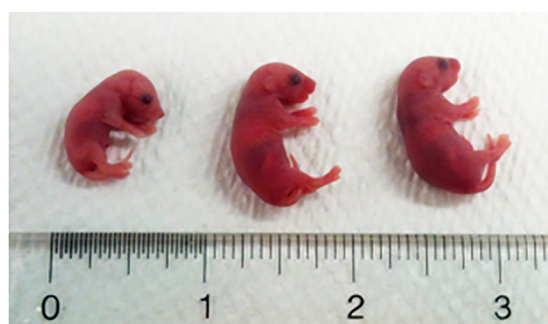

**CSNK1D  
Genotyping  
Result**

**(-/-)**

**(+/-)**

**(+/-)**
