# Supplementary material for: Lack of Casein Kinase 1 Delta Promotes Genomic Instability - The Accumulation of DNA Damage and Down-Regulation of Checkpoint Kinase 1
Source: PubMed Central journal article supplement (PMC5268481; doi:10.1371/journal.pone.0170903), 2017-01-26

### S3 Fig

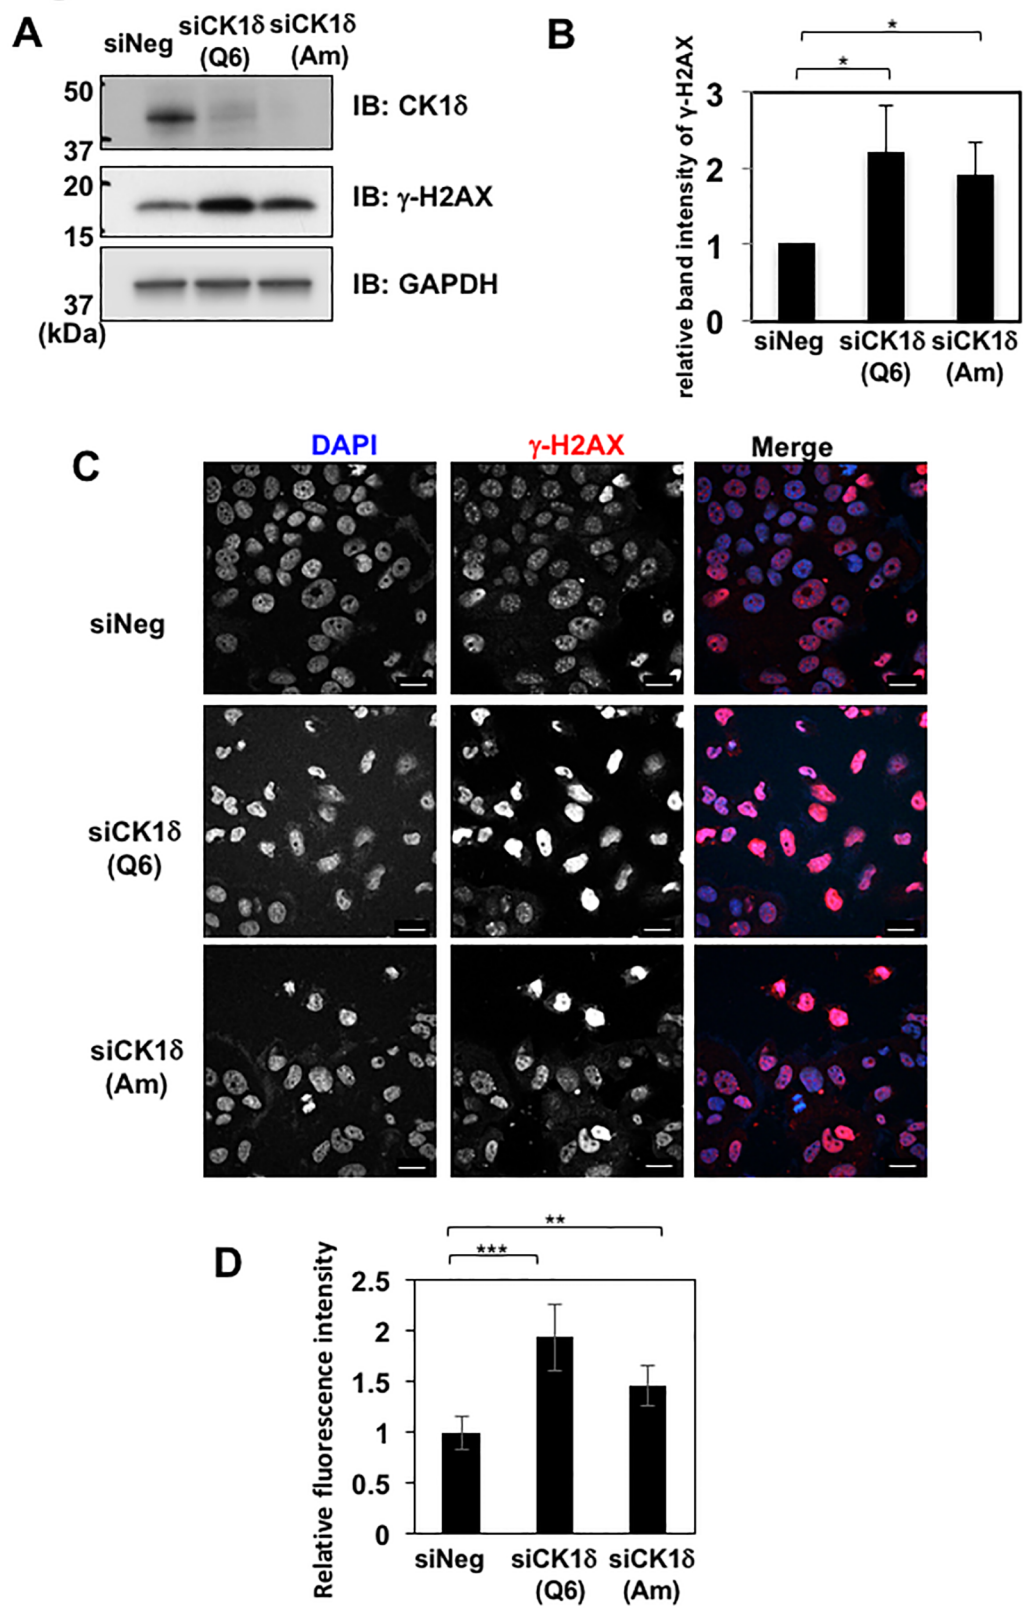

Supplement: pone.0170903.s003.pdf [file pone.0170903.s003.pdf]
