# Supplementary material for: Lack of Casein Kinase 1 Delta Promotes Genomic Instability - The Accumulation of DNA Damage and Down-Regulation of Checkpoint Kinase 1
Source: PubMed Central journal article supplement (PMC5268481; doi:10.1371/journal.pone.0170903), 2017-01-26

# S9 Fig

## Area1: PMH/MH (pontomedullary/medullary hindbrain)

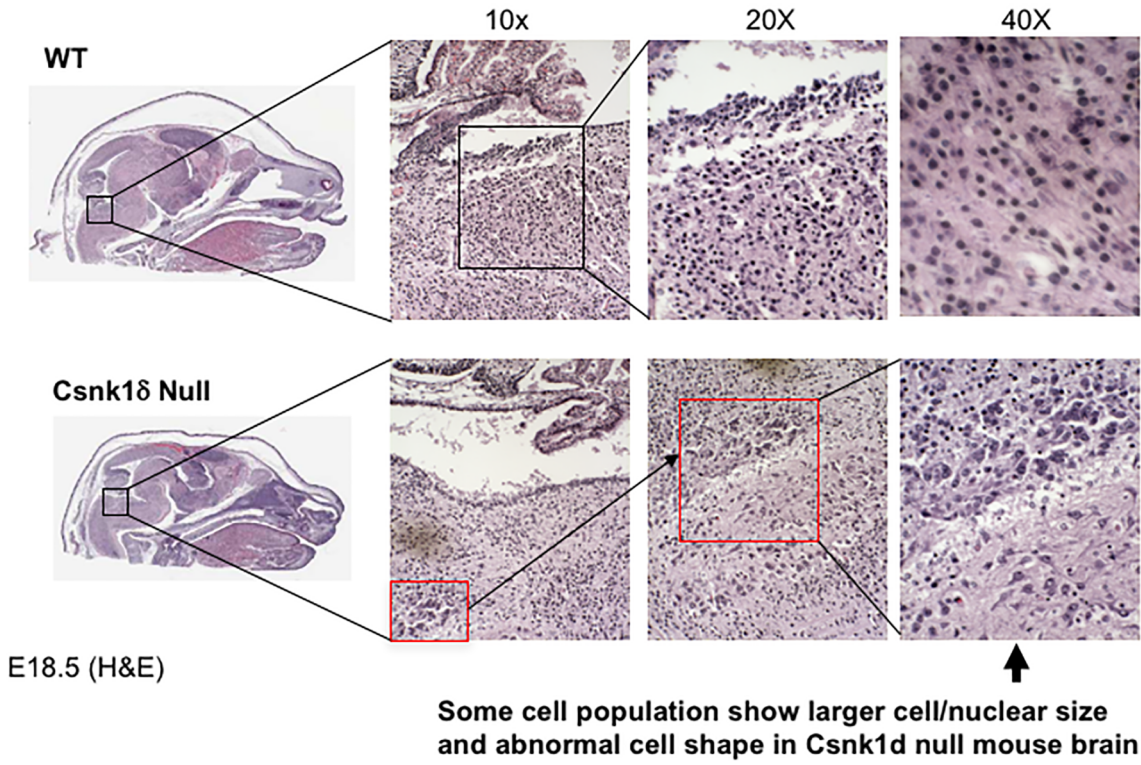

## Area2: Midbrain

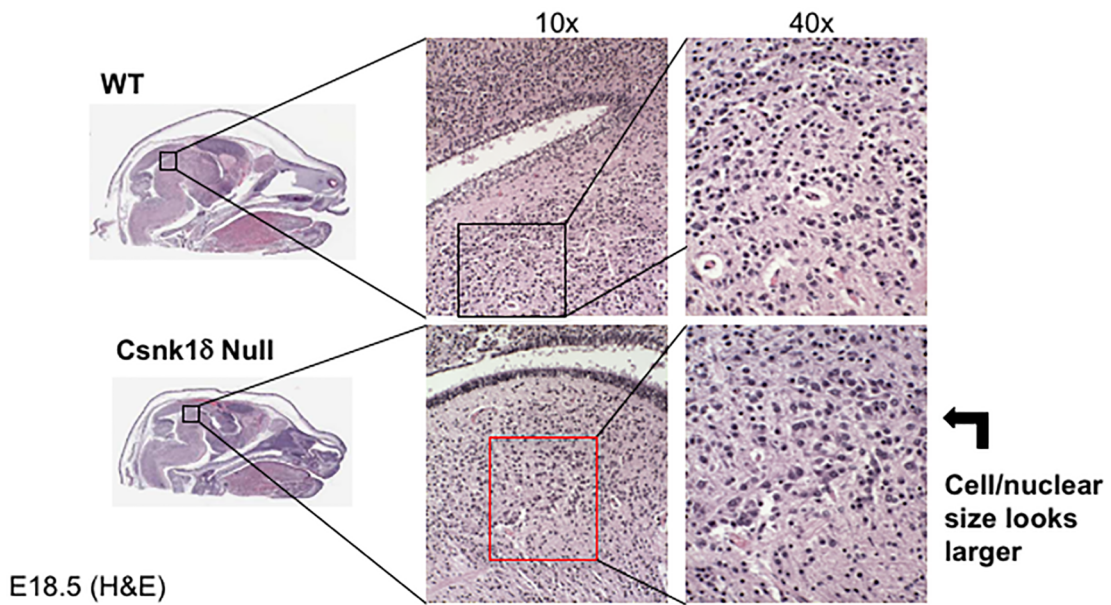

Supplement: pone.0170903.s009.pdf [file pone.0170903.s009.pdf]
