# Supplementary material for: Lack of Casein Kinase 1 Delta Promotes Genomic Instability - The Accumulation of DNA Damage and Down-Regulation of Checkpoint Kinase 1
Source: PubMed Central journal article supplement (PMC5268481; doi:10.1371/journal.pone.0170903), 2017-01-26
Supplement: pone.0170903.s010.pdf [file pone.0170903.s010.pdf]

# S1 Table

| antibody                  | host species | vendor/source     | catalog number | IF (dilution) | WB (dilution) |
|---------------------------|--------------|-------------------|----------------|---------------|---------------|
| acetylated-tubulin        | Mouse        | Sigma             | T6793          | IF (1:2000)   | N/A           |
| gamma-tubulin             | Rabbit       | Sigma             | T3559          | IF (1:2000)   | N/A           |
| gamma-tubulin             | Goat         | Santa Cruz        | sc-7396        | IF (1:500)    | N/A           |
| gamma-H2AX                | Mouse        | EMD Millipore     | 05-636         | IF (1:5000)   | WB (1:5000)   |
| gamma-H2AX                | Goat         | Santa Cruz        | sc-7396        | IF (1:500)    | N/A           |
| CK1delta                  | Mouse        | Santa Cruz        | sc-55553       | N/A           | WB (1:500)    |
| Chk1                      | Mouse        | Santa Cruz        | sc-8408        | IF (1:500)    | WB (1:1000)   |
| Phospho-Chk1 (Ser345)     | Rabbit       | Cell Signaling    | #2348          | IF (1:250)    | WB (1:500)    |
| Cdc2/CDK1                 | Rabbit       | GeneTex           | GTX108120      | N/A           | WB (1:500)    |
| phospho-Cdc2/CDK1 (Tyr15) | Rabbit       | Cell Signaling    | #4539          | N/A           | WB (1:500)    |
| HSC70                     | Mouse        | Santa Cruz        | sc-7298        | N/A           | WB (1:5000)   |
| Myc                       | Mouse        | Life Technologies | R950-25        | N/A           | WB (1:2000)   |
| alpha-tubulin             | Mouse        | Life Technologies | A11126         | N/A           | WB (1:5000)   |
| LC3 A/B                   | Rabbit       | Cell Signaling    | #4108          | IF (1:250)    | N/A           |
| LAMP1                     | Mouse        | Santa Cruz        | sc-17768       | IF (1:250)    | N/A           |

| siRNA                            | Vendor/source | cat#       | sense sequence        |
|----------------------------------|---------------|------------|-----------------------|
| Mm_Csnk1d_1 FlexiTube siRNA      | Qiagen        | SI00960883 | CAAUUGUGUAAAUAUAAAtt  |
| Mm_Csnk1d_2 FlexiTube siRNA      | Qiagen        | SI00960890 | GAAGGAUGUUGACCUUAAAtt |
| Hs_CSNK1D_6 FlexiTube siRNA      | Qiagen        | SI00287413 | CCCUGACGAUCCACUGUAtt  |
| Human CSNK1D siRNA               | Ambion        | 4392420    | UGAUCAGUCGCAUCGAAUAtt |
| All Stars Negative Control siRNA | Qiagen        | SI0365038  | N/A                   |
